# Supplementary material
Source: publisher figshare collection journal article supplement (https://tandf.figshare.com/ndownloader/files/31078903)
Supplement: Supplementary file 1 [file 31078903]

**Supplementary document**

Table 4. Parameters estimates in the model without covariates tested for memory specificity

| Parameters | Estimate | SE | t (CI) | P |
| --- | --- | --- | --- | --- |
| **Regression coefficients (fixed effects)** |  |  |  |  |
| Intercept | -.36 | .58 | -.62 (-1.52, .78) | .531 |
| Direct trauma memory Vs. Non-trauma memory (ref) | .39 | .18 | 2.11 (.02, .76) | .035 |
| Direct trauma memory Vs. Indirect trauma memory (ref) | .66 | .32 | 2.04 (.02, 1.30) | .041 |
| Indirect trauma memory Vs. Non-trauma memory (ref) | -.27 | .30 | -.89 (-.86, .32) | .372 |
| Cumulative trauma | .001 | .02 | .06 (-.04, .04) | .95 |
| PTSD | -.09 | .02 | -.33 (-14, -.01) | .045 |
| Settings (Malaysia Vs Bangladesh) | 1.45 | .28 | 5.02 (.88, 2.02) | .000 |
| **Variance components (Random effects)** | .50 | .17 | 2.93 (.25, .98) | .003 |
| AIC Corrected | 4203.975 |  |  |  |
| BIC | 4208.777 |  |  |  |

*Notes.* SE indicates Standard Error; CI means Confidence Interval
